# Supplementary material for: Enhanced performances of triboelectric nanogenerators by filling hierarchical flower-like TiO2 particles into polymethyl methacrylate film
Source: Royal Society of Chemistry journal article supplement (doi:10.1039/d0nr02925d), 2020-01-01
Supplement: d0nr02925d1.pdf [file d0nr02925d1.pdf]

## Supporting Information

# Enhanced Performances of Triboelectric Nanogenerator by Filling Hierarchical Flower-Like TiO<sub>2</sub> Particles into Polymethyl Methacrylate Film

Gang Jian<sup>a,\*</sup>, Qingzhen Meng<sup>a</sup>, Yong Jiao<sup>a</sup>, Fang Meng<sup>b,\*</sup>, Yanpeng Cao<sup>a</sup>, and Mingfang Wu<sup>a,\*</sup>

<sup>a</sup> School of Materials Science and Engineering, Jiangsu University of Science and Technology, Zhenjiang 212003, China

<sup>b</sup> Saint Gobian Crystals, 17900 Great Lakes Pkwy, Hiram, Ohio 44234, United States

E-mail: fmeng2@vols.utk.edu (F. Meng); gjian@just.edu.cn (G. Jian);

wu\_mingfang@163.com (M. Wu)

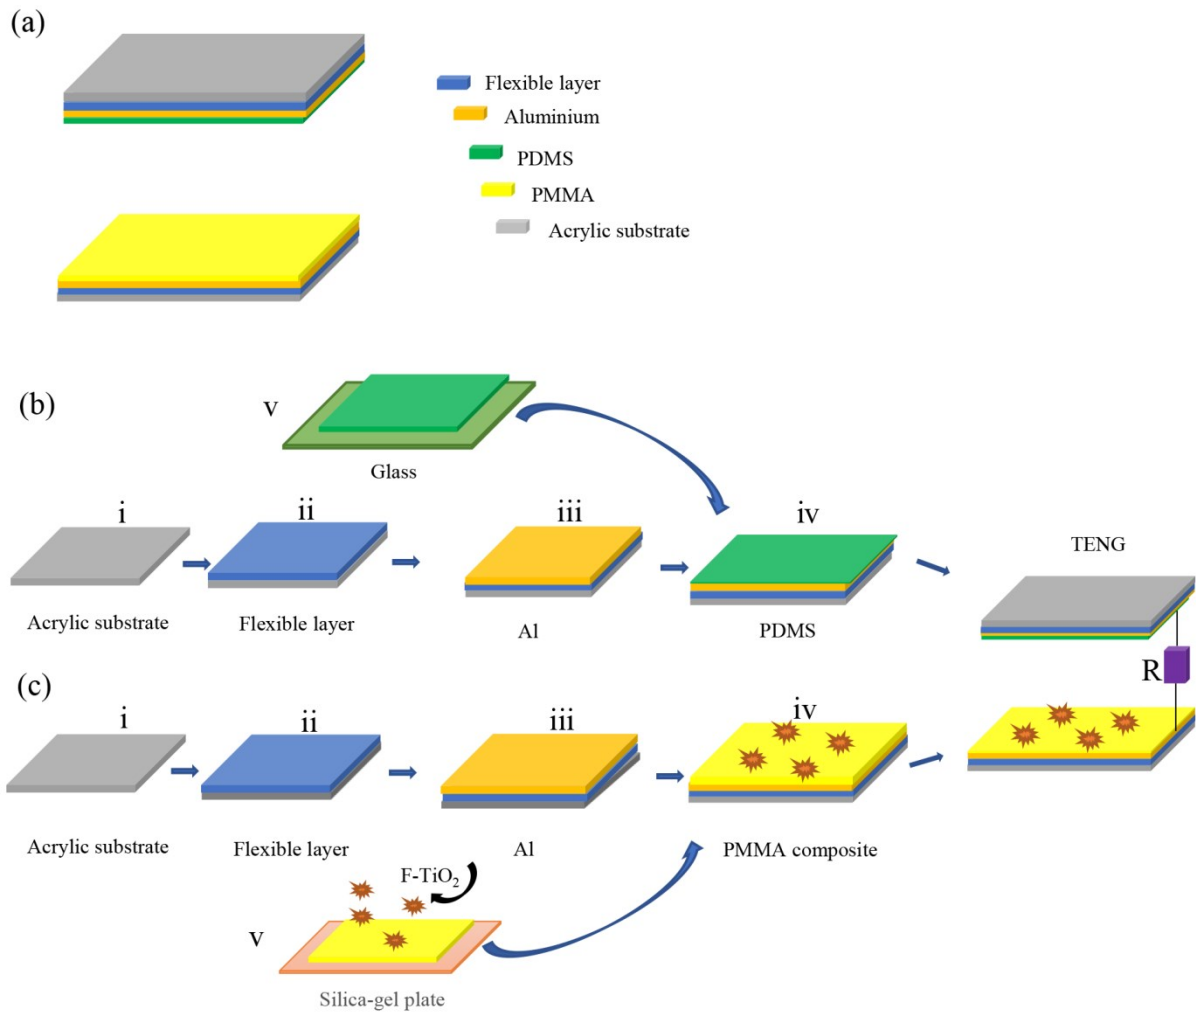

Figure S1. (a) The schematic illustration of the triboelectric nanogenerator. (b) The schematic of fabrication process of PMMA/F-TiO<sub>2</sub> composite. (c) The schematic of fabrication process of PDMS.

Morphology of TiO<sub>2</sub> particles

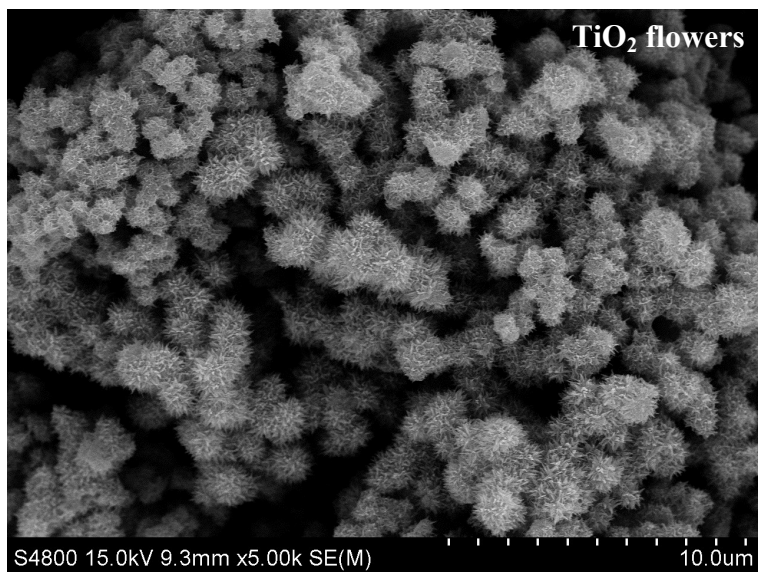

Figure S2. SEM image of flower-like TiO<sub>2</sub> particles.

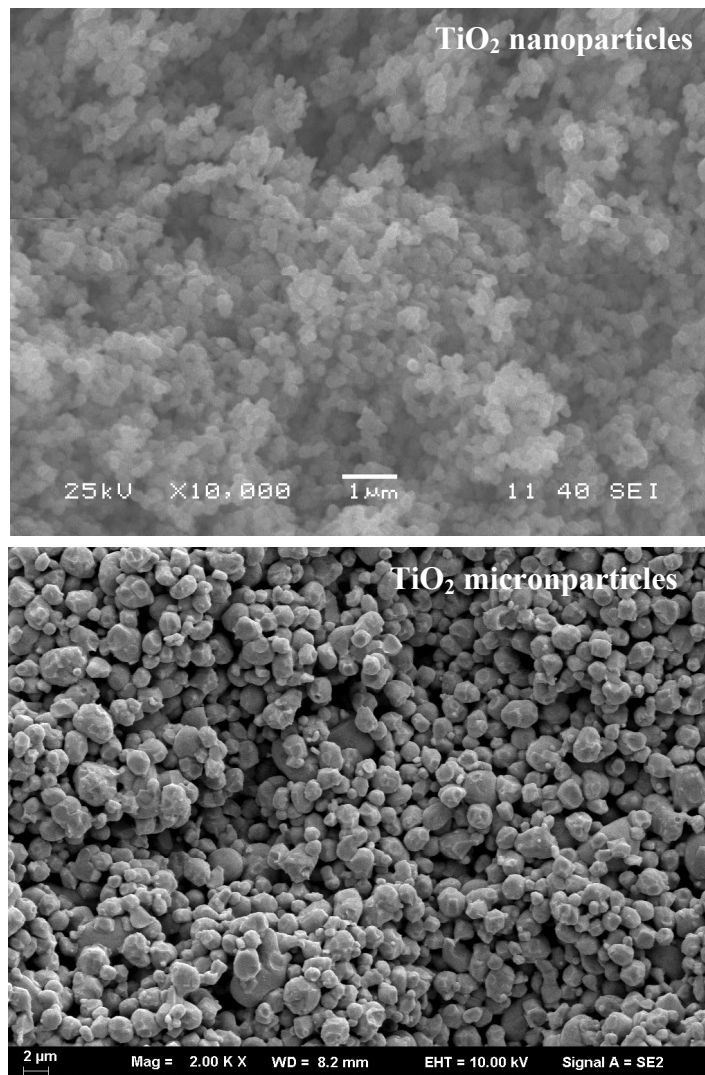

Figure S3. SEM image of TiO<sub>2</sub> nanoparticles and micronparticles.

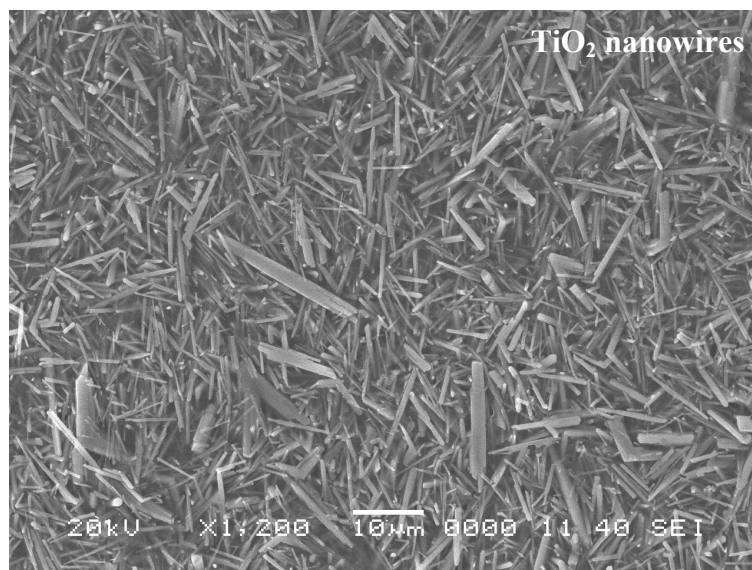

Figure S4. SEM image of TiO<sub>2</sub> nanowires.

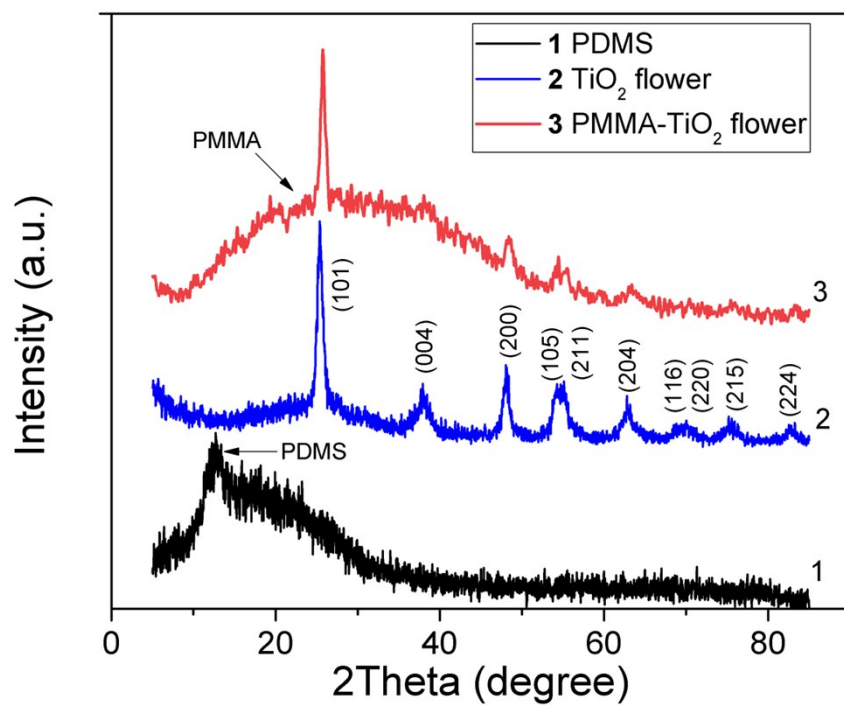

Figure S5. XRD patterns of the PDMS film, the TiO<sub>2</sub> flower and PMMA-TiO<sub>2</sub> flower composites. The phase of the positive and negative tribo-materials can be confirmed, which are PMMA-TiO<sub>2</sub> flower composites and the PMDS film, respectively.

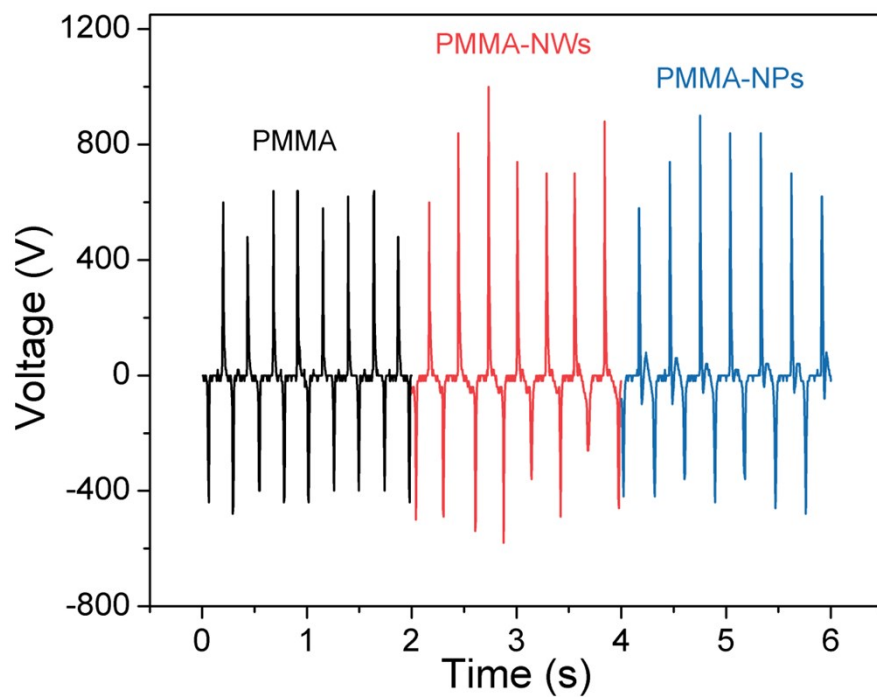

Figure S6. The open-circuit voltage of PDMS/PMMA-40%(TiO<sub>2</sub> NWs), PDMS/PMMA-40% (TiO<sub>2</sub> NPs) and PDMS/PMMA TENGs.

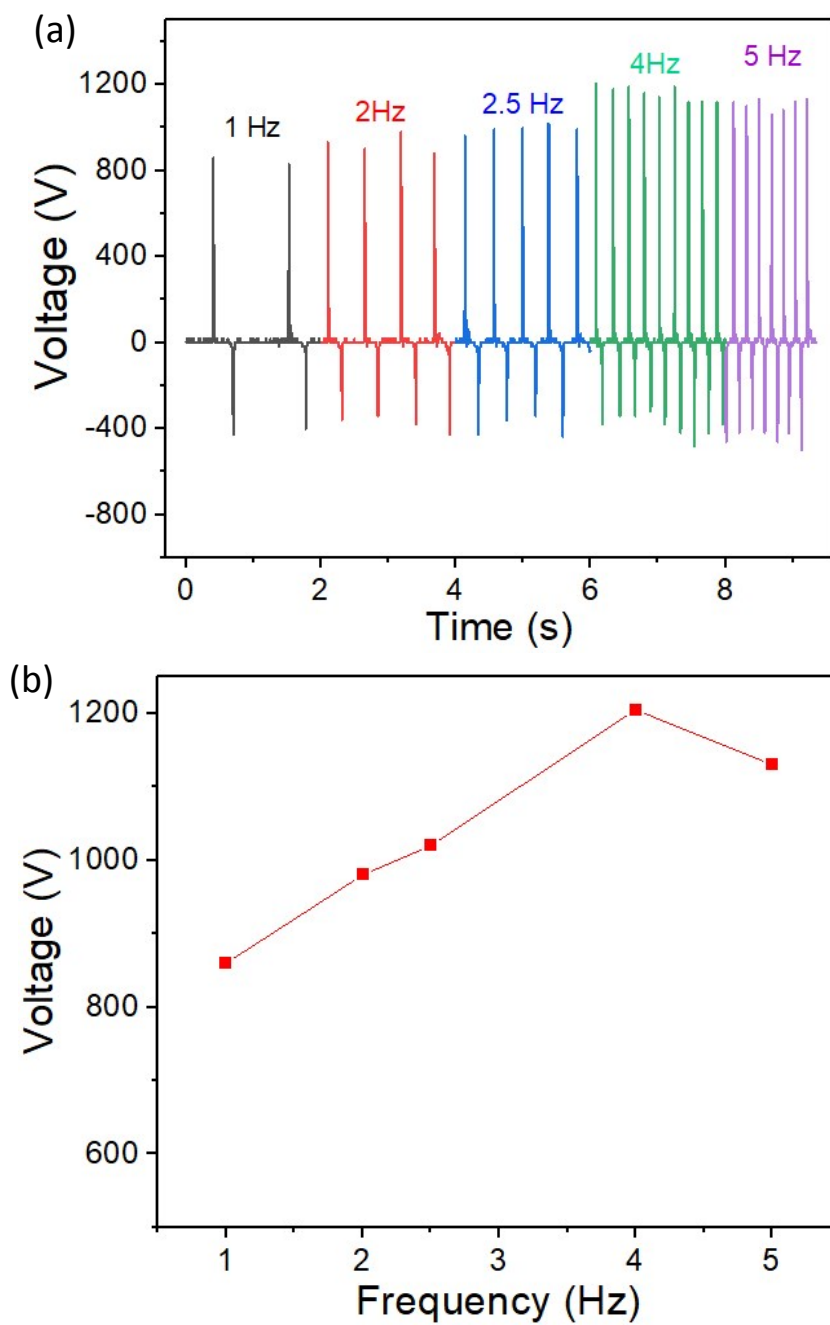

Figure S7. (a) The open-circuit voltage of the PDMS/PMMA-40%(F-TiO<sub>2</sub>) TENG at different frequencies. (b) The positive peak open-circuit voltage of the PDMS/PMMA-40%(F-TiO<sub>2</sub>) TENG as a function of the frequency.



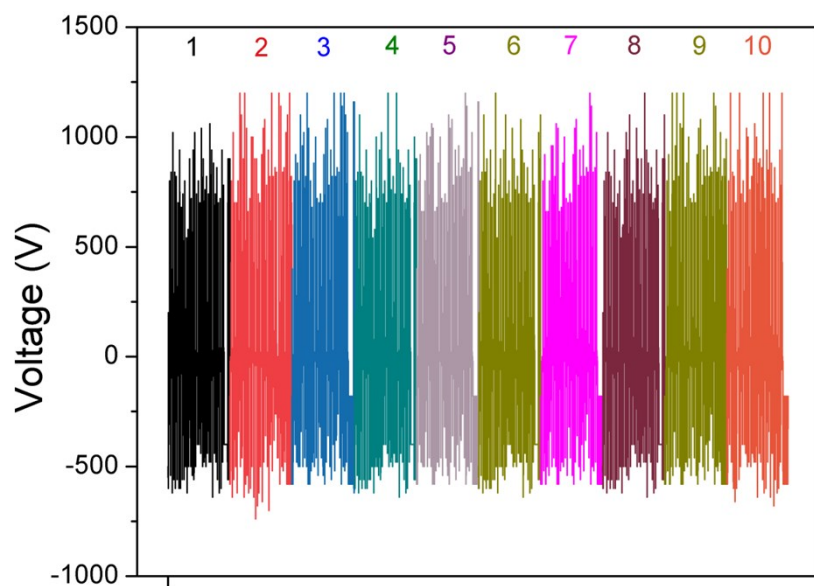

Figure S8. Open-circuit voltage outputs of the PDMS/PMMA-40%(F-TO<sub>2</sub>) TENG at different days (50 cycles each day, 1–10 days) after the device was fabricated. Good stability and reliability of the TENG can be observed.
